# Supplementary material
Source: PubMed Central journal article supplement (PMC5564035)
Supplement: Supp_Table1.pdf [file Supp_Table1.pdf]

## Supplementary Data

SUPPLEMENTARY TABLE S1. ENZYME-LINKED IMMUNOSORBENT ASSAY KITS USED TO QUANTIFY MUCOSAL PROTEINS IN THE CERVICOVAGINAL FLUID LAVAGE

| <i>Protein</i>                                                                                                                                                                                                                                                                                                                                                      | <i>Kit and/or analysis system manufacturer</i>                                                                                                           |
|---------------------------------------------------------------------------------------------------------------------------------------------------------------------------------------------------------------------------------------------------------------------------------------------------------------------------------------------------------------------|----------------------------------------------------------------------------------------------------------------------------------------------------------|
| Secretory leukocyte protease inhibitor (SLPI)                                                                                                                                                                                                                                                                                                                       | R&D Systems, Minneapolis, MN                                                                                                                             |
| Human neutrophil peptides 1–3 (HNP1–3) and elafin                                                                                                                                                                                                                                                                                                                   | Hycult Biotech, Plymouth Meeting, PA                                                                                                                     |
| Human alpha defensin 5 (HD5)                                                                                                                                                                                                                                                                                                                                        | Antibodies Online, Atlanta, GA                                                                                                                           |
| Human beta defensin 2 and 3 (HBD-2, HBD-3)                                                                                                                                                                                                                                                                                                                          | Alpha Diagnostic International, San Antonio, TX                                                                                                          |
| Lactoferrin                                                                                                                                                                                                                                                                                                                                                         | EMD Millipore, Billerica, MA                                                                                                                             |
| interleukin 1 $\beta$ (IL-1 $\beta$ ), macrophage inflammatory protein 1 $\alpha$ (MIP-1 $\alpha$ ), macrophage inflammatory protein 1 $\beta$ (MIP-1 $\beta$ ), tumor necrosis factor $\alpha$ (TNF- $\alpha$ ), interferon gamma inducible protein 10 (IP-10), growth-regulated protein $\alpha$ (GRO- $\alpha$ ), and intercellular adhesion molecule 1 (ICAM-1) | MAGPIX analytical test instrument, which utilizes xPONENT 4.2 software (Luminex)<br>Analysis was done using MILLIPLEX Analyst software (version 3.5.5.0) |
